# Supplementary material
Source: Springer Nature journal article supplement (https://www.springermedizin.de/resource/supplementary/12963_2006_50_MOESM1_ESM.pdf/9572530)

Percent of Responses

1 2 3 4 5

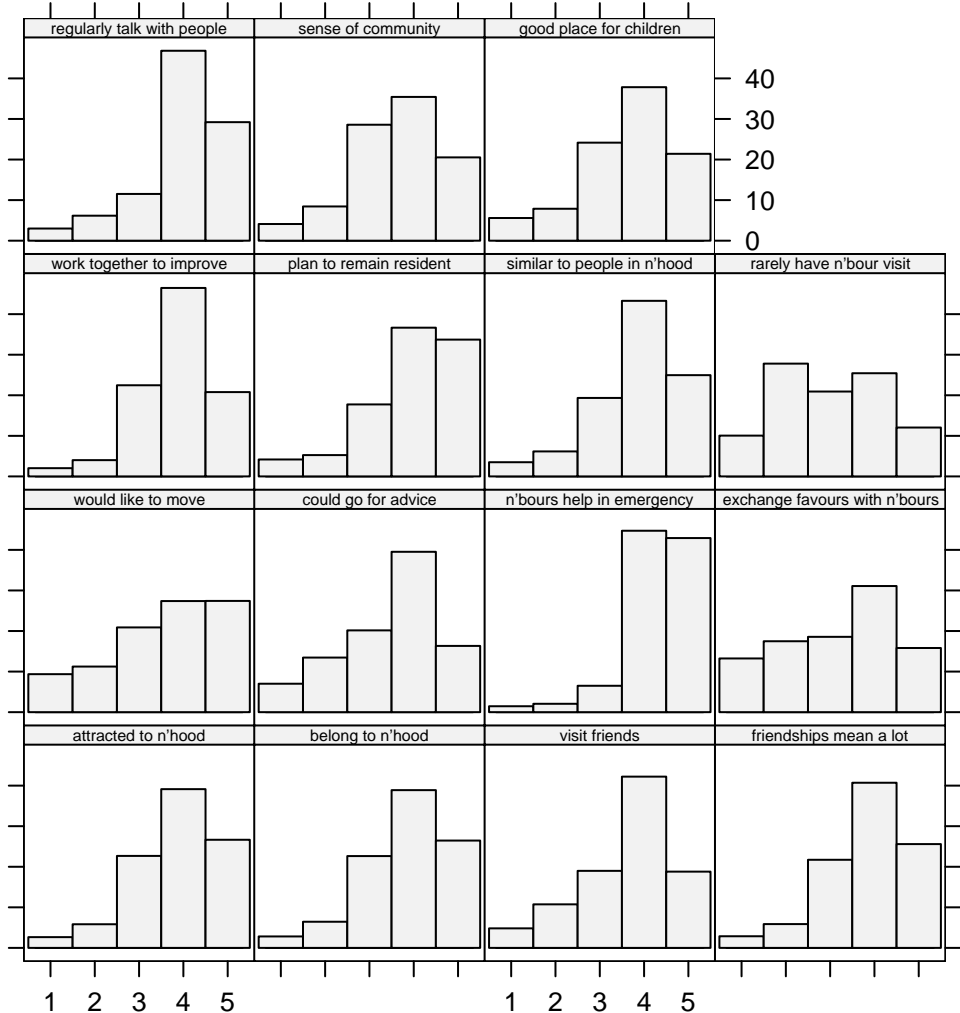

Supplement: MOESM1 [file 9572530]
